# Supplementary material for: The acceptability of testing contacts of confirmed COVID-19 cases using serial, self-administered lateral flow devices as an alternative to self-isolation
Source: bioRxiv or medRxiv preprint supplement (doi:10.1101/2021.03.23.21254168), 2021-03-26
Supplement: Supplementary file [file media-1.pdf]

**Supplementary Figures**

**Supplementary Table 1 – Self-reported reasons for consenting to take part in the serial self-testing study**

| Reason for consenting                       | Number of participants | Percentage of participants |
|---------------------------------------------|------------------------|----------------------------|
| Duty to take part/societal benefit          | 298                    | 33.8%                      |
| Would like the assurance of daily testing   | 268                    | 30.4%                      |
| Do not wish to isolate for 10/14 days       | 229                    | 26.0%                      |
| Other - unspecified reason/ no reason given | 58                     | 6.6%                       |
| Convenience e.g. shopping, exercise         | 16                     | 1.8%                       |
| To return to work                           | 9                      | 1.0%                       |
| Curiosity                                   | 2                      | 0.2%                       |
| Other - specified reason                    | 2                      | 0.2%                       |
| <b>Total</b>                                | <b>882</b>             | <b>100%</b>                |

**Supplementary Table 2 – Self-reported reasons for declining to take part in the serial self-testing study**

| Reason for Declining                                      | Number of participants | Percentage of participants |
|-----------------------------------------------------------|------------------------|----------------------------|
| Already tested positive                                   | 197                    | 22.4%                      |
| Already tested and awaiting result                        | 127                    | 14.5%                      |
| Does not want to commit to daily testing                  | 102                    | 11.6%                      |
| Does not want to perform self-testing                     | 69                     | 7.9%                       |
| Would prefer to self isolate/made arrangements to isolate | 56                     | 6.4%                       |
| Uncooperative                                             | 45                     | 5.1%                       |
| Already booked a test                                     | 33                     | 3.8%                       |
| Already tested negative                                   | 33                     | 3.8%                       |
| Other - specified reason                                  | 21                     | 2.4%                       |
| Does not want to waste resources                          | 20                     | 2.3%                       |
| Already part of a testing programme                       | 19                     | 2.2%                       |
| Household member is a case                                | 19                     | 2.2%                       |
| Met exclusion criteria                                    | 17                     | 1.9%                       |
| Would rather isolate with rest of household               | 16                     | 1.8%                       |
| Did not want to isolate for longer if testing positive    | 15                     | 1.7%                       |
| Length of time for testing is too long                    | 15                     | 1.7%                       |
| Not willing to take part in research                      | 15                     | 1.7%                       |
| Is unable to perform self-testing                         | 11                     | 1.3%                       |
| Other - unspecified reason/ no reason given               | 11                     | 1.3%                       |
| At end of isolation period                                | 9                      | 1.0%                       |
| Concerns about test performance                           | 9                      | 1.0%                       |
| Concerns about spreading infection                        | 5                      | 0.6%                       |
| Unable to work so prefer to isolate                       | 5                      | 0.6%                       |
| Language barrier                                          | 4                      | 0.5%                       |
| Would find testing uncomfortable                          | 3                      | 0.3%                       |
| Technological barrier                                     | 2                      | 0.2%                       |
| <b>Total</b>                                              | <b>878</b>             | <b>100%</b>                |

**Supplementary Table 3 - Socio-demographic characteristics of contacts of confirmed cases of COVID-19 who consented and reported a result (n=570\*) and those posted a kit who did not report a result (n=220\*\*)**

|                                      |                     | Reported<br>(n=570*) |          |       | Did not report<br>(n=220**) |          |       | p-value |
|--------------------------------------|---------------------|----------------------|----------|-------|-----------------------------|----------|-------|---------|
|                                      |                     | Proportion (Number)  |          |       | Proportion (Number)         |          |       |         |
| <b>Sex</b>                           | Female              | 51%                  | [47-55%] | (291) | 50%                         | [43-56%] | (110) | 0.79    |
|                                      | Male                | 49%                  | [45-53%] | (279) | 50%                         | [44-57%] | (110) |         |
| <b>Age</b>                           | Mean                | 42                   |          |       | 42                          |          |       | 0.77    |
|                                      | 95% CI              | 41 - 43              |          |       | 40 - 44                     |          |       |         |
|                                      | Range               | 18 - 80              |          |       | 18 - 80                     |          |       |         |
| <b>Geography</b>                     | East Midlands       | 11%                  | [8-14%]  | (63)  | 9%                          | [5-12%]  | (19)  | 0.45    |
|                                      | East of England     | 21%                  | [18-25%] | (121) | 16%                         | [11-21%] | (36)  |         |
|                                      | London              | 12%                  | [9-15%]  | (68)  | 16%                         | [11-21%] | (36)  |         |
|                                      | North East          | 5%                   | [3-6%]   | (26)  | 5%                          | [2-7%]   | (10)  |         |
|                                      | North West          | 12%                  | [9-14%]  | (66)  | 9%                          | [5-13%]  | (20)  |         |
|                                      | South East          | 16%                  | [13-19%] | (89)  | 16%                         | [11-21%] | (36)  |         |
|                                      | South West          | 7%                   | [5-9%]   | (40)  | 9%                          | [5-12%]  | (19)  |         |
|                                      | West Midlands       | 8%                   | [6-11%]  | (48)  | 11%                         | [7-15%]  | (24)  |         |
|                                      | Yorkshire & Humber  | 9%                   | [6-11%]  | (49)  | 9%                          | [5-13%]  | (20)  |         |
| <b>Ethnicity</b>                     | Asian               | 3%                   | [2-4%]   | (16)  | 6%                          | [3-9%]   | (12)  | 0.01    |
|                                      | Black               | 2%                   | [0.5-3%] | (8)   | 5%                          | [2-7%]   | (9)   |         |
|                                      | Mixed               | 4%                   | [2-6%]   | (22)  | 2%                          | [0-3%]   | (3)   |         |
|                                      | White               | 90%                  | [88-93%] | (481) | 85%                         | [81-90%] | (170) |         |
|                                      | Other               | 1%                   | [0.2-2%] | (6)   | 3%                          | [0.3-5%] | (5)   |         |
| <b>Index of multiple deprivation</b> | 1 - Most deprived   | 5%                   | [4-7%]   | (31)  | 5%                          | [2-8%]   | (12)  | 0.33    |
|                                      | 2                   | 7%                   | [5-9%]   | (41)  | 10%                         | [6-13%]  | (21)  |         |
|                                      | 3                   | 11%                  | [9-14%]  | (65)  | 14%                         | [9-19%]  | (31)  |         |
|                                      | 4                   | 10%                  | [8-13%]  | (58)  | 10%                         | [6-14%]  | (23)  |         |
|                                      | 5                   | 9%                   | [6-11%]  | (50)  | 11%                         | [7-16%]  | (25)  |         |
|                                      | 6                   | 15%                  | [12-18%] | (84)  | 9%                          | [5-13%]  | (19)  |         |
|                                      | 7                   | 9%                   | [7-11%]  | (51)  | 10%                         | [6-15%]  | (23)  |         |
|                                      | 8                   | 12%                  | [9-14%]  | (66)  | 7%                          | [3-10%]  | (15)  |         |
|                                      | 9                   | 12%                  | [9-14%]  | (66)  | 10%                         | [6-13%]  | (21)  |         |
|                                      | 10 - Least deprived | 10%                  | [8-13%]  | (58)  | 14%                         | [9-18%]  | (30)  |         |

\* Includes 5 participants who were not recruited via the Agile Lighthouse. Data completeness for those who consented was 100% for sex, 99.6% for age, 100% for geography and IMD (excluding 1 non-England case) and 93.5% for ethnicity.

\*\* Excludes 27 of 247 participants who did not report an LFD result but were known to have not received a kit/received a kit too late to participate. Date completeness for those who declined was 100% for sex, 99.5% for age, 100% for geography and IMD and 90.4% for ethnicity.

**Supplementary Figure 1 – Participant images showing range of positive results obtained**

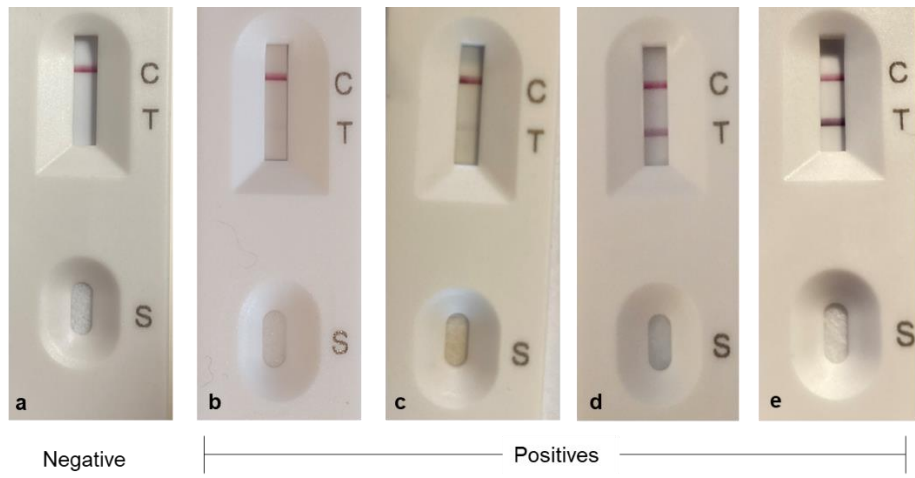

**Supplementary Table 4 – CT Values obtained for positive samples tested at PHE Colindale, individuals reporting at least one LFD result prior to PCR swab**

| ct (cycle threshold value) | All (n=64)  |             | Positive LFD positive PCR (n=53) |             | Negative LFD positive PCR (n=11) |             |
|----------------------------|-------------|-------------|----------------------------------|-------------|----------------------------------|-------------|
|                            | ORF1ab*     | E gene      | ORF1ab                           | E gene      | ORF1ab*                          | E gene      |
| <b>Mean</b>                | <b>22.8</b> | <b>22.4</b> | <b>22.3</b>                      | <b>22.0</b> | <b>24.0</b>                      | <b>24.6</b> |
| <b>Median</b>              | <b>21.9</b> | <b>21.0</b> | <b>20.8</b>                      | <b>20.0</b> | <b>24.0</b>                      | <b>25.5</b> |
| <b>Min</b>                 | <b>14.0</b> | <b>13.8</b> | <b>14.0</b>                      | <b>13.8</b> | <b>16.9</b>                      | <b>16.9</b> |
| <b>Max</b>                 | <b>35.7</b> | <b>34.2</b> | <b>35.7</b>                      | <b>34.2</b> | <b>32.1</b>                      | <b>33.5</b> |

\*One PCR sample was negative for the ORF1ab gene target
